# Supplementary material for: The link between liver fat and cardiometabolic diseases is highlighted by genome-wide association study of MRI-derived measures of body composition
Source: PubMed Central journal article supplement (PMC9675774; doi:10.1038/s42003-022-04237-4), 2022-11-19
Supplement: 42003_2022_4237_MOESM2_ESM.pdf [file 42003_2022_4237_MOESM2_ESM.pdf]

## Supplementary Information

### *Visceral adipose tissue*

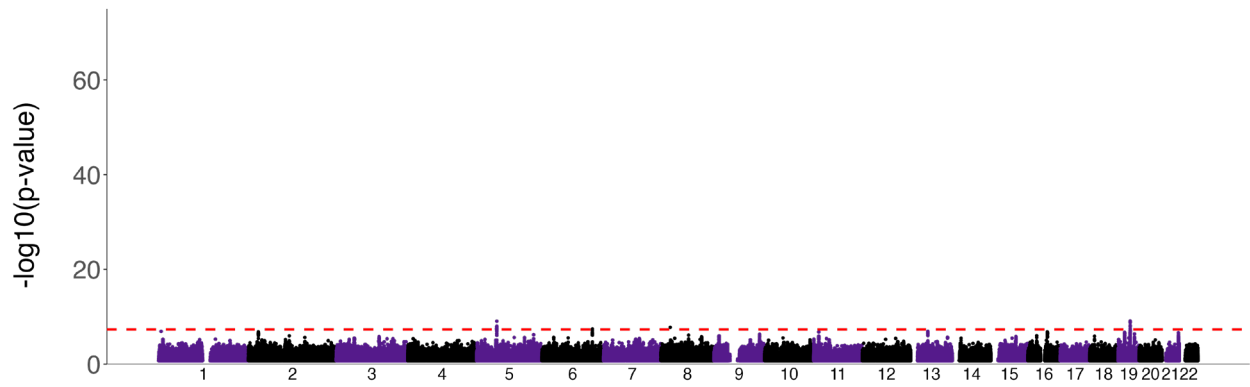

### *Abdominal subcutaneous adipose tissue*

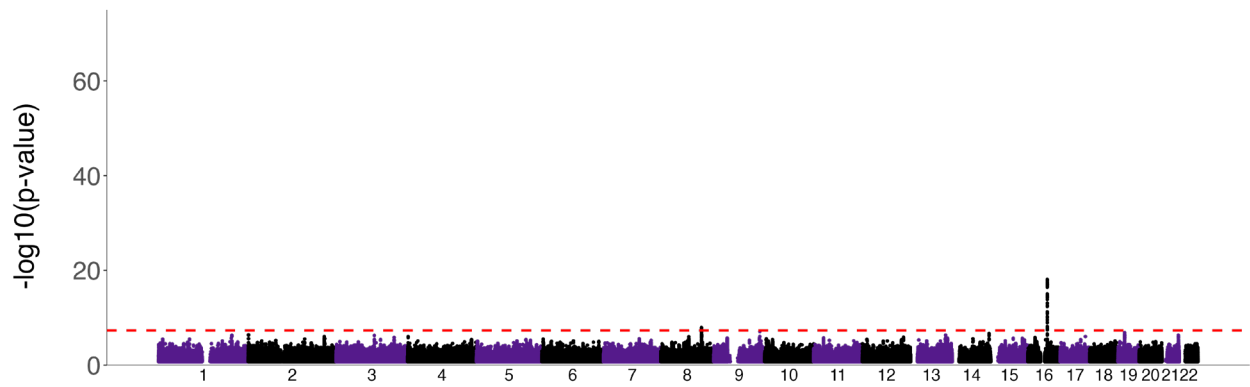

### *Anterior thigh muscle volume*

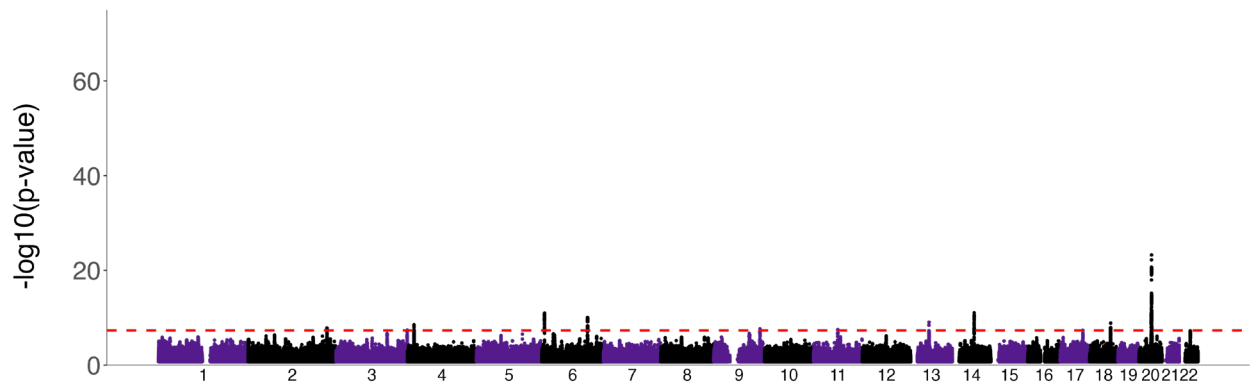

*Posterior thigh muscle volume*

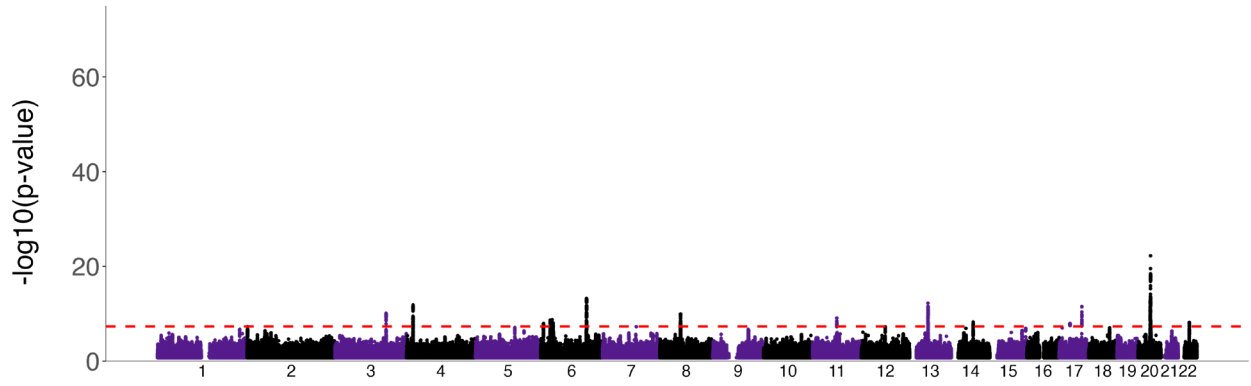

*Anterior thigh muscle fat infiltration (%)*

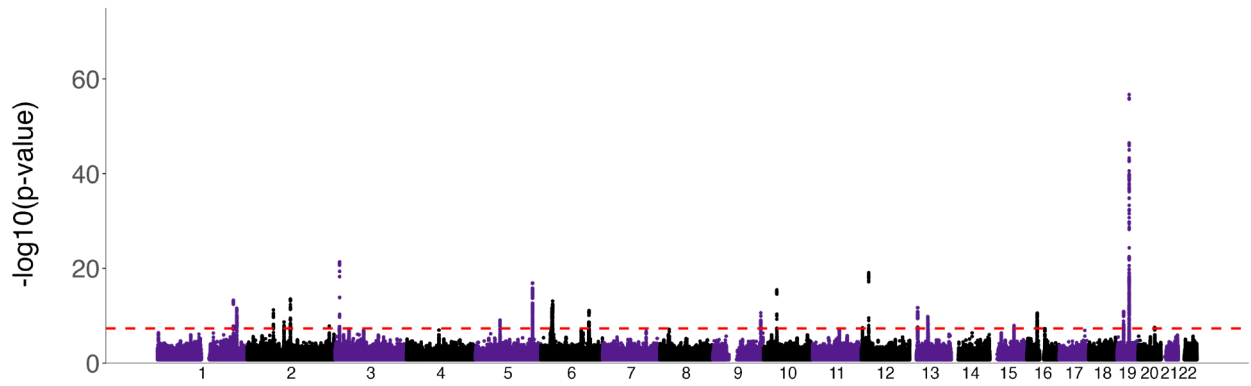

*Posterior thigh muscle fat infiltration (%)*

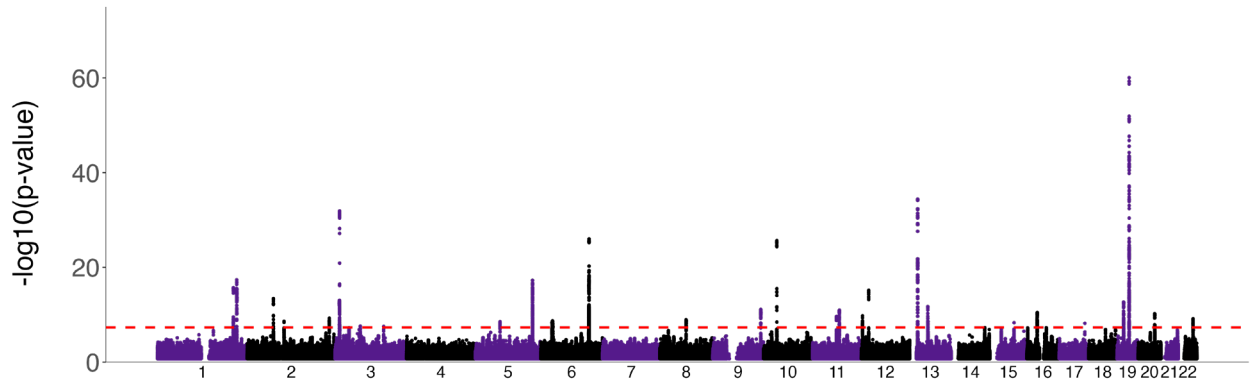

*Weight-muscle-ratio*

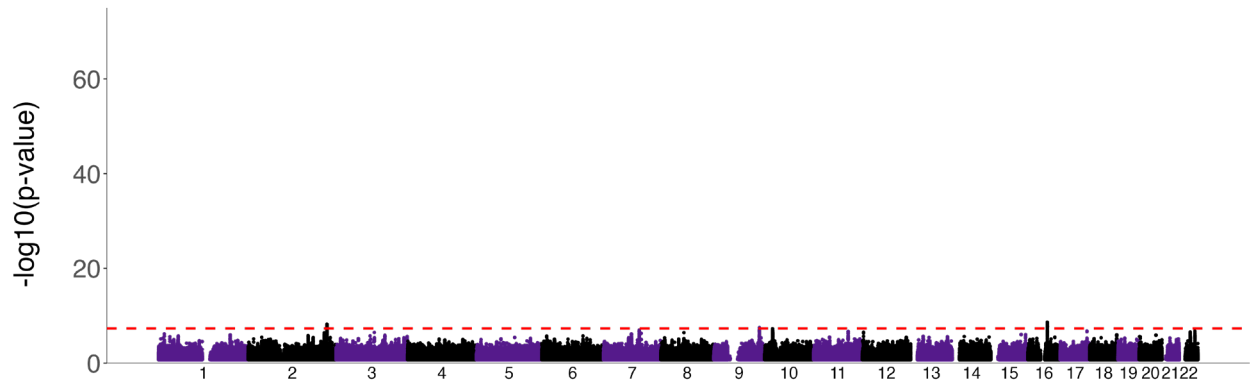

*Abdominal fat ratio*

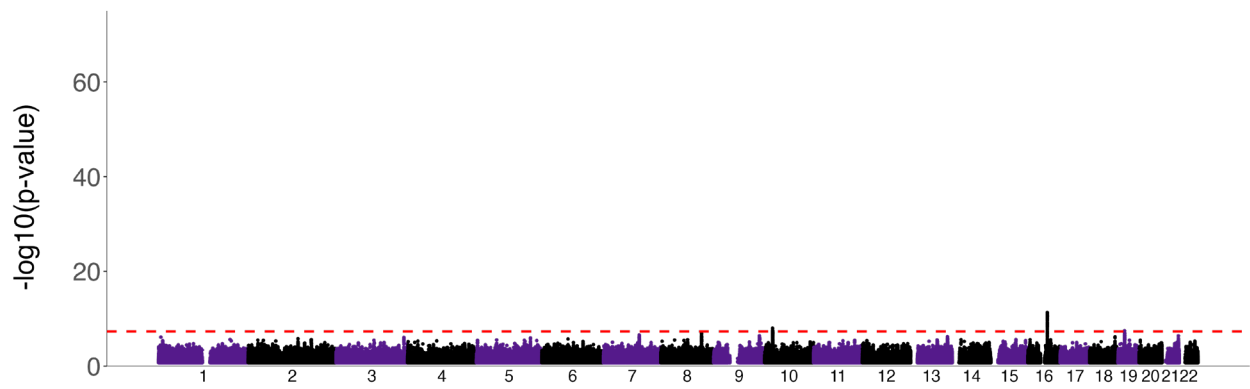

*Liver proton density fat fraction (%)*

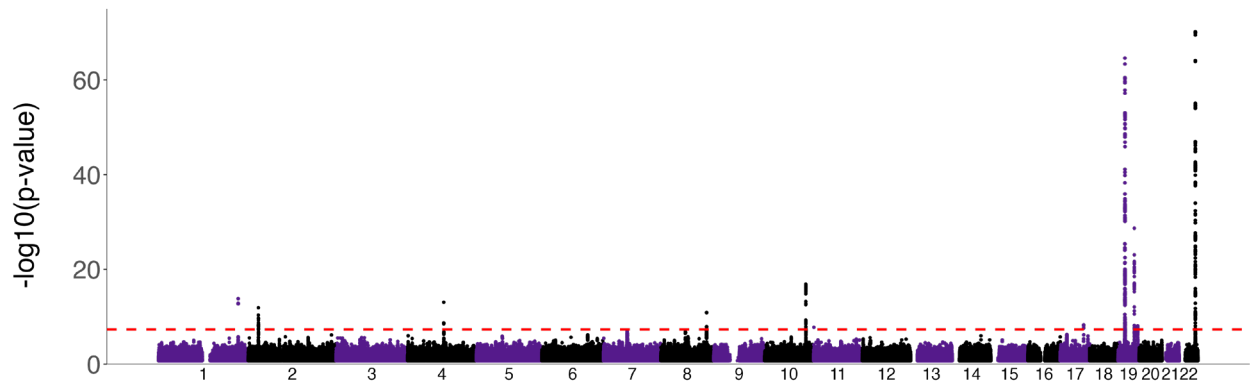

*VAT/height<sup>2</sup>*

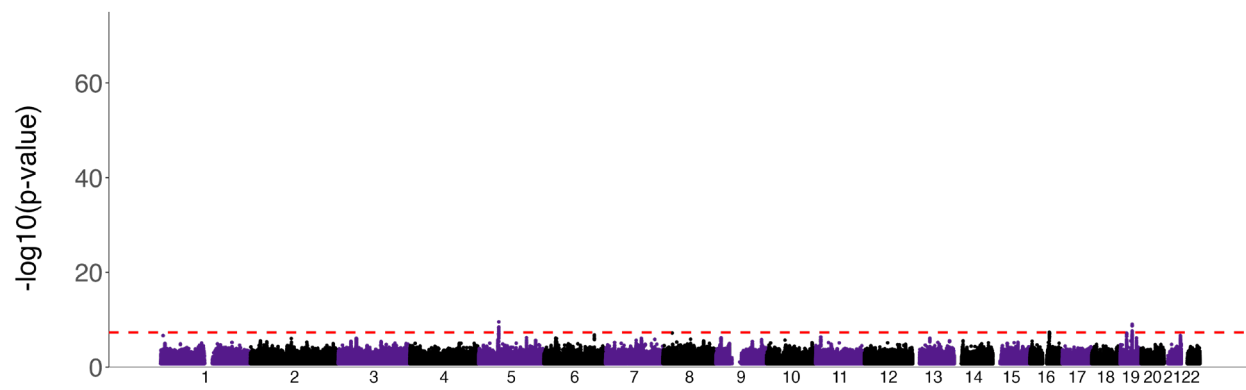

*ASAT/height<sup>2</sup>*

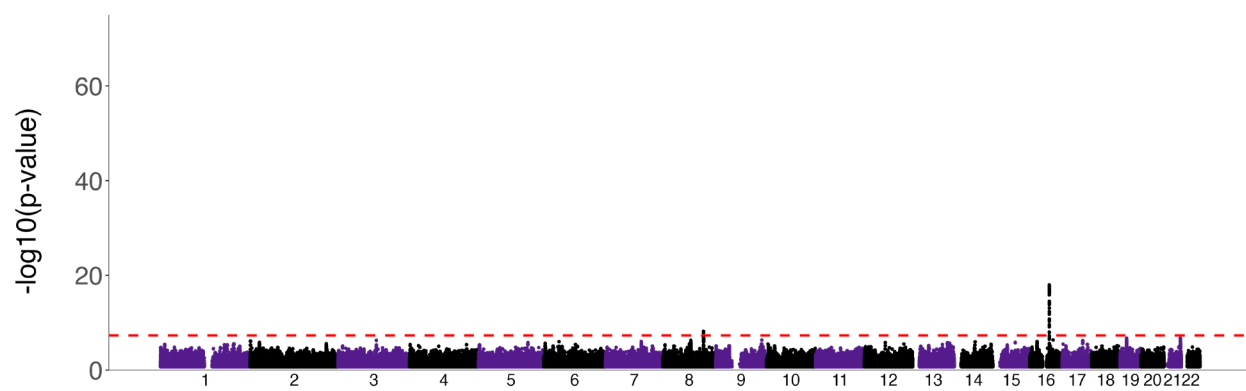

*ATMV/height<sup>2</sup>*

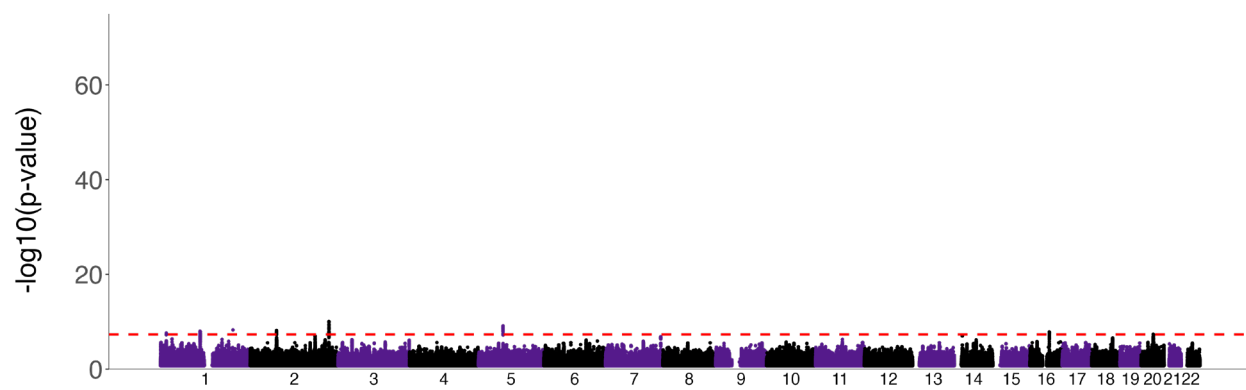

*PTMV/height<sup>2</sup>*

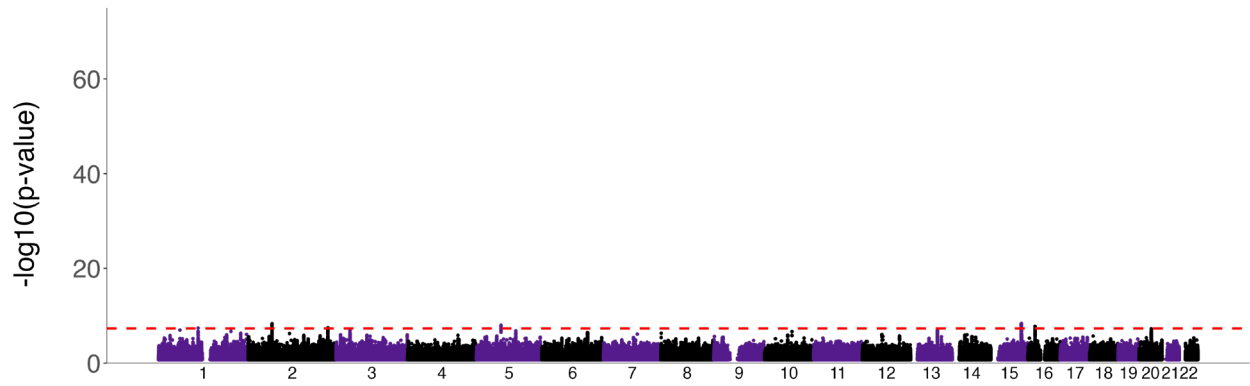

*Total thigh muscle volume (TTMVz; age, height, weight and sex corrected)*

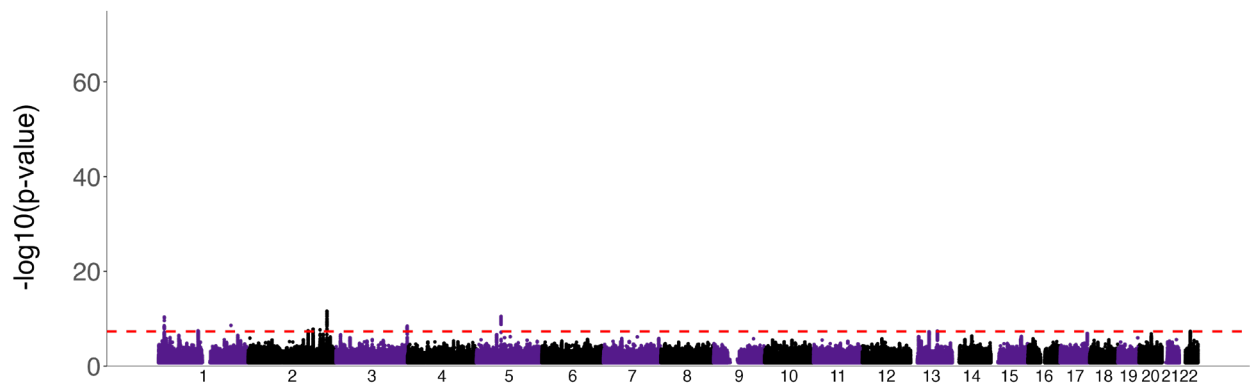

**Supplementary Figure 1. Manhattan plots for each of the MRI-derived measures of body composition, as indicated above each of the plots. The x-axis indicates genomic position, ordered by chromosome, the y-axis indicates the  $-\log_{10}(p)$ . The red horizontal dotted line indicates nominal GWAS significance threshold ( $p=5*10^{-8}$ ).**

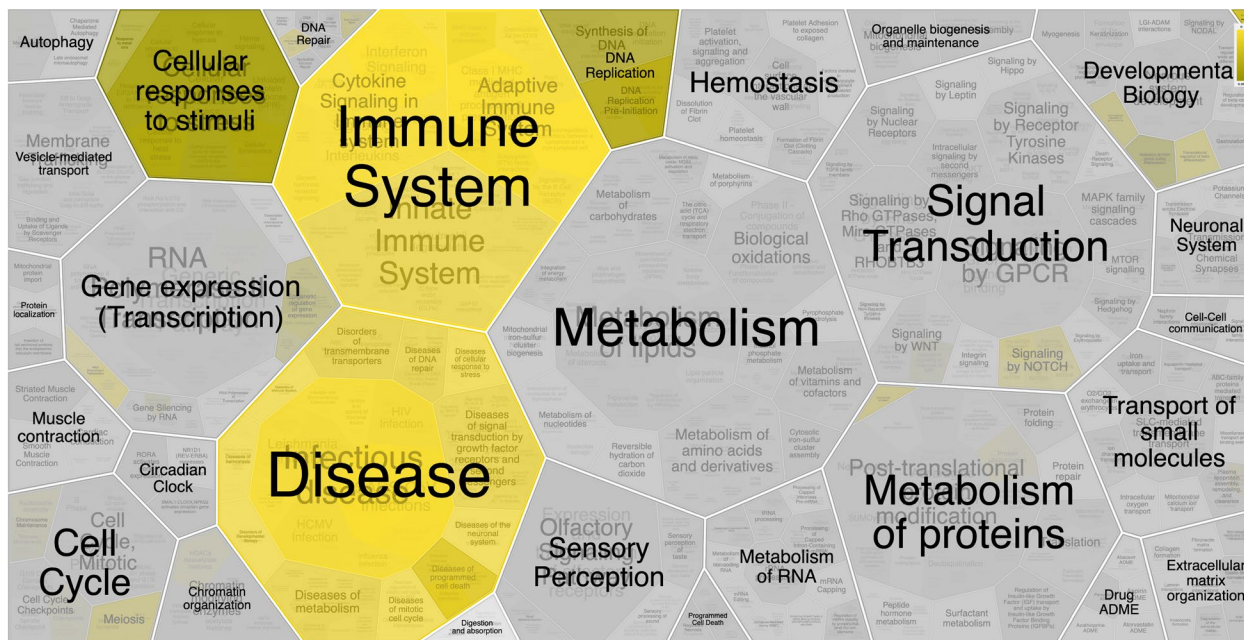

**Supplementary Figure 2. Visual representation of the output from coupling the MOSTest-identified set of genes to the Reactome database. Brighter yellow indicates higher significance. Information on the specific pathways and their significance is provided in the Supplementary Data 5.**

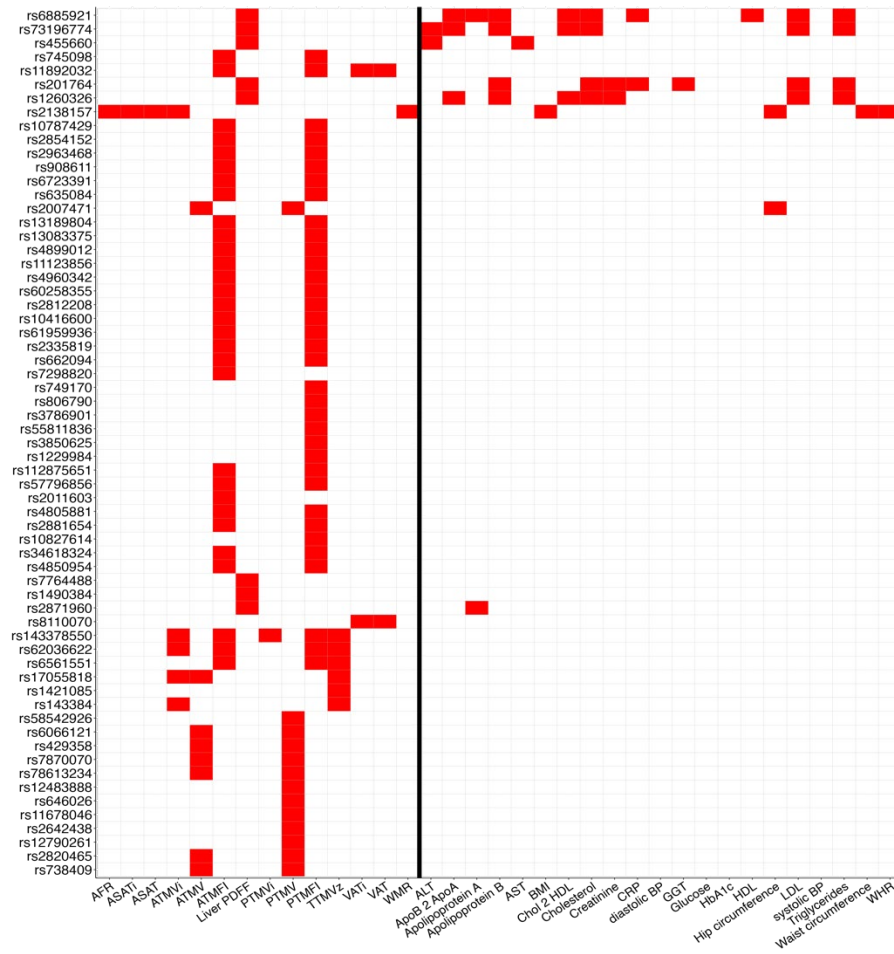

**Supplementary Figure 3. Novelty of loci discovered through the univariate GWAS of body MRI measures.** The rs-codes on the y-axis represent the lead SNPs of the discovered loci, and on the x-axis are all the studied measures; on the left of the vertical black line are the body MRI measures and on the right are the secondary measures of cardiometabolism. Red cells indicate that the SNP is whole-genome significantly associated with the measure.

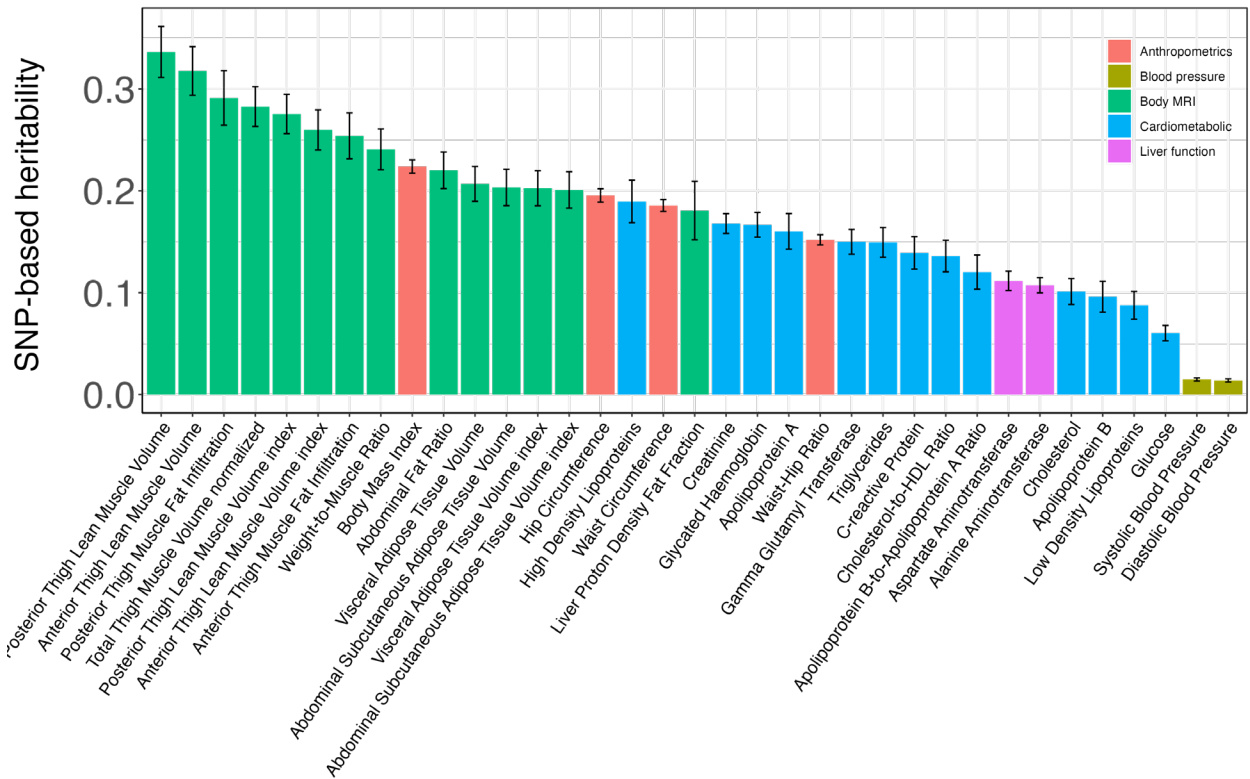

**Supplementary Figure 4.** Bar plot summarizing the SNP-based heritability (y-axis) for each of the univariate measures analyzed (x-axis), as calculated through LD score regression. This tool was applied to the GWAS summary statistics, derived from N=33 588 individuals. The fill of the bars indicates the measurement category, as indicated in the legend. The error bars reflect standard error.



***Supplementary Table 1. Results from sex-stratified GWAS on the body MRI measures, listing locus yields and genetic correlations ( $r_g$ ) between the male and female-specific GWAS.***

| Measure                                            | $r_g$ | Male yield | Female yield |
|----------------------------------------------------|-------|------------|--------------|
| Abdominal Fat Ratio                                | 0.84  | 0          | 0            |
| Abdominal Subcutaneous Adipose Tissue Volume index | 0.79  | 1          | 1            |
| Abdominal Subcutaneous Adipose Tissue Volume       | 0.73  | 1          | 1            |
| Anterior Thigh Lean Muscle Volume index            | 0.56  | 0          | 0            |
| Anterior Thigh Lean Muscle Volume                  | 0.63  | 3          | 1            |
| Anterior Thigh Muscle Fat Infiltration             | 0.89  | 6          | 6            |
| Liver Proton Density Fat Fraction                  | 0.8   | 6          | 3            |
| Posterior Thigh Lean Muscle Volume index           | 0.58  | 0          | 0            |
| Posterior Thigh Lean Muscle Volume                 | 0.6   | 2          | 3            |
| Posterior Thigh Muscle Fat Infiltration            | 0.97  | 7          | 11           |
| Total Thigh Muscle Volume normalized               | 0.73  | 0          | 0            |
| Visceral Adipose Tissue Volume index               | 0.76  | 0          | 0            |
| Visceral Adipose Tissue Volume                     | 0.78  | 0          | 0            |
| Weight-to-Muscle Ratio                             | 0.82  | 0          | 0            |
